# Supplementary material for: Production and Sensing of Butyrate in a Probiotic E. coli Strain
Source: PubMed Central journal article supplement (PMC7279287; doi:10.3390/ijms21103615), 2020-05-20
Supplement: ijms-21-03615-s001.pdf [file ijms-21-03615-s001.pdf]

**Supplementary materials:**  
**Table S1.** Primers used in this study.

| <b>Name</b>                       | <b>Sequences (5'-3')</b>                                              |
|-----------------------------------|-----------------------------------------------------------------------|
| <b>gRNA-up</b>                    | ACTAGTATTATACCTAGGACTGAG                                              |
| <b>gRNA-down-mgsA</b>             | GTCCTAGGTATAAATACTAGT <u>AACGTCAACGCGATGTTGAGGTTTTAGAGCTAGAAATAGC</u> |
| <b>gRNA-down-frdA</b>             | GTCCTAGGTATAAATACTAGT <u>AAATGACCCAACTGGAAGTGGTTTTAGAGCTAGAAATAGC</u> |
| <b>gRNA-down-ldhA</b>             | GTCCTAGGTATAAATACTAGT <u>AAAACCGCTAAAAGTGGCAAGTTTTAGAGCTAGAAATAGC</u> |
| <b>gRNA-down-pta</b>              | GTCCTAGGTATAAATACTAGT <u>ACGATAGTCGTAGTCTGATCGTTTTAGAGCTAGAAATAGC</u> |
| <b>gRNA-down-adhE</b>             | GTCCTAGGTATAAATACTAGT <u>GACTCTGGGTTGTGGTTCCIGTTTTAGAGCTAGAAATAGC</u> |
| <b>gRNA-pl-promoter-atoD-down</b> | GTCCTAGGTATAAATACTAGT <u>AACATTCAATAATCTCATTGTTTTAGAGCTAGAAATAGC</u>  |
| <b>gRNA-H-NS-down</b>             | GTCCTAGGTATAAATACTAGT <u>TTACAGCTGGAGTACGGCCCGTTTTAGAGCTAGAAATAGC</u> |
| <b>frdA-L-up</b>                  | ACTGGTGATACTTCGCCATC                                                  |
| <b>frdA-L-down</b>                | CACTAATCTCAAAAAGTATACCGGTGGCGAAGCGGATGC 阿 AG                          |
| <b>frdA-R-up</b>                  | CTGCATCCGCTTCGCCACCGGTATACTTTTGAGATTAGTG                              |
| <b>frdA-R-down</b>                | AGTTAGGAATGGATGCGCTC                                                  |
| <b>ldhA-L-up</b>                  | ATCATACGGGTCATTGCCAG                                                  |
| <b>ldhA-L-down</b>                | GTCCTTTGGCTTTGAGCTGGATTCCTGACAGCAGAAGCTC                              |
| <b>ldhA-R-up</b>                  | GAGCTTCTGCTGTCAGGAATCCAGCTCAAAGCCAAAGGAC                              |
| <b>ldhA-R-down</b>                | CCCACCAGATAACGGAGATC                                                  |
| <b>adhE-L-up</b>                  | GTCTGAATAACGGCACTG                                                    |
| <b>adhE-L-down</b>                | CACTCAAGAGCAAGTAGACACTACGGTCGTGATTATGTAG                              |
| <b>adhE-R-up</b>                  | CTACATAATCACGACCGTAGTGTCTACTTGCTCTTGAGTG                              |
| <b>adhE-R-down</b>                | AAGACGCGCTGACAATAC                                                    |
| <b>pta-L-up</b>                   | ACTACGCGACGAAAGAAGAC                                                  |
| <b>pta-L-down</b>                 | GTTAACCGGCTTGCGCATAAACGCCTTTGCGTTCCATTG                               |
| <b>pta-R-up</b>                   | CAATGGAACGCAAAGGCGTTTATGCGCAAGCCGGTTAAC                               |

---

|                     |                                                                          |
|---------------------|--------------------------------------------------------------------------|
| <b>pta-R-down</b>   | CAGAATGCGAAATGAGTGTG                                                     |
| <b>pl-L-up</b>      | TCATTTAATACTGCCGCCTC                                                     |
| <b>pl-L-down</b>    | GTGCTCAGTATCACCGCCAGTGGTATTTATGTCAACACCGCCGCTATGCAGAAAATTGCGCA<br>C      |
| <b>pl-R-up</b>      | <b>GGCGGTGTTGACATAAATACCACTGGCGGTGATACTGAGCAC</b> TGCAAGAGGGATAAAAAATG   |
| <b>pl-R-down</b>    | GTCAGGTTGCCAAGTGTGTC                                                     |
| <b>pl-yz-FP</b>     | AATACCACTGGCGGTGATAC                                                     |
| <b>mgsA-L-up</b>    | CAACACGCTGGCCGAAGT                                                       |
| <b>mgsA-L-down</b>  | GCTCAGTATCACCGCCAGTGGTATTTATGTCAACACCGCCATCCAGTCGCCGCATTTTC              |
| <b>mgsA-R-up</b>    | ACCCCTTGGGGCCTCTAAACGGGTCTTGAGGGGTTTTTTGCGTTCCACCCAGCTCATC               |
| <b>mgsA-R-down</b>  | CTCGCCATTACCTCAACTG                                                      |
| <b>hbd-up</b>       | <b>GGCGGTGTTGACATAAATACCACTGGCGGTGATACTGAGCAC</b> AGGGAGGTCTGTTTAATG     |
| <b>hbd-down</b>     | CATGACTAATCCTCCTAAAATTTATTTTGAATAATCGTAG                                 |
| <b>crt-up</b>       | CTACGATTATTCAAATAAATTTTAGGAGGATTAGTCATG                                  |
| <b>crt-down</b>     | CAATCATATCATACCTCCAGCTATCTATTTTTGAAGCCTTC                                |
| <b>ter-up</b>       | GAAGGCTTCAAAAATAGATAGCTGGAGGTATGATATGATTG                                |
| <b>ter-down</b>     | CAAAAAACCCCTCAAGACCCGTTTAGAGGCCCAAGGGGTTATGCTAGTTAAATCCTGTCGA<br>ACCTTTC |
| <b>hct-yz-mgsFP</b> | CCTTATTCACCAGGCGATTG                                                     |
| <b>hct-yz-mgsRP</b> | TGCCTGAGCAATTCCTGAAC                                                     |
| <b>pdmb-PpchA-</b>  | CGCGGTCAAAAAATGCTAAGGCTGTTTTGGCGGATGAGA                                  |
| <b>pchA-up</b>      |                                                                          |
| <b>pdmb-PpchA-</b>  | GGTACGGATATATTCCTGTGCAGCTCATTTTCAGAATATTTGCCAGAAC                        |
| <b>pchA-down</b>    |                                                                          |
| <b>PpchA-pchA-</b>  | GTTCTGGCAAATATTCTGAAATGAGCTGCACAGGAATATATCCGTACC                         |
| <b>pdmb-up</b>      |                                                                          |
| <b>PpchA-pchA-</b>  | TCTCATCCGCCAAAACAGCCTTAGCATTTTTTTGACCGCG                                 |
| <b>pdmb-down</b>    |                                                                          |

---

---

**LEE1-32-GFP-up** CATAACGGTTCTGGCAAATATTACTTGTACAGCTCGTCC  
**LEE1-32-GFP-down** TTGACATTTAATGATAATGTATTTTACACATTAAAGAAGGAGATATACATATGGTGAGCAAGGG  
**CGAGG**  
**pdm-b-AA-LEE1-32-up** ACATTATCATTAAATGTCAATTCTGAAATGAGCTGCACAGGAATATATCCGTAC  
**pdm-b-AA-LEE1-32-down** GGACGAGCTGTACAAGTAATATTTGCCAGAACCGTTATG  
**pdm-b-AA-GFP-LEE1-98-down** GATAATGTATTTTACACATTATTTGTTTAACTTTAAGAAGG  
**pdm-b-AA-GFP-LEE1-98+152-up** CTTCTTAAAGTTAAACAAAGCTTTAATATTTTAAGCT  
**pdm-b-AA-GFP-LEE1-98+152-down** AGCTTAAAATATTAAGCTTTGTTTAACTTTAAGAAG  
**pdm-b-AA-GFP-LEE1-98+218-up** GAAGAAAATCATCTCGTTAATTCTGAAATGAGCTGCACAG  
**pdm-b-AA-GFP-LEE1-98+218-down** CAAGTCCATACATTCAGCTTTTTGTTTAACTTTAAGAAG  
**LEE1-98+218-up** CTTCTTAAAGTTAAACAAAAGCTGAATGTATGGACTTG  
**LEE1-98+218-down** CTGTGCAGCTCATTTCAGAATTAACGAGATGATTTTCTTC  
**pdm-b-AA-GFP-LEE1-379+152-up** CATAAGCTACAGCCAGCACTTCTGAAATGAGCTGCACAG  
**pdm-b-AA-GFP-LEE1-379+152-down** ATAGCTTAAAATATTAAGCTTTGTTTAACTTTAAGAAGGAGATATACCATGGTGAGCAAGGG  
**CGAGG**  
**LEE1-379+152-up** CCTTCTTAAAGTTAAACAAAGCTTTAATATTTTAAGCTAT

---

---

**LEE1-379+152-** CTGTGCAGCTCATTTCAGAAAGTGCTGGCTGTAGCTTATG

**down**

**LEE1-379+444-up** CTTCTTAAAGTTAAACAAAGCTGTCGGCCTACGCCGAC

**pdmB-AA-GFP-** GTCGGGCGTAGGCCGACAGCTTTGTTAACTTTAAGAAG

**LEE1-379+444-**

**down**

**pdmB-AA-GFP-** CCTTCTTAAAGTTAAACAAATAATGTGTAAAATACATTATC

**LEE1-379+444-up**

---

The red characters are pI promoter sequences. The underline parts indicated the N20 sequences.
